# Supplementary material for: Dietary Supplementation of Tannin-Extracts to Lambs: Effects on Meat Fatty Acids Composition and Stability and on Microbial Characteristics
Source: PubMed Central journal article supplement (PMC6836261; doi:10.3390/foods8100469), 2019-10-10
Supplement: foods-08-00469-s001.pdf [file foods-08-00469-s001.pdf]

# Dietary Supplementation of Tannin-Extracts to Lambs: Effects on Meat Fatty Acids Composition and Stability and on Microbial Characteristics

Luisa Biondi <sup>1</sup>, Cinzia L. Randazzo <sup>1,\*</sup>, Nunziatina Russo <sup>1</sup>, Alessandra Pino <sup>1</sup>, Antonio Natalello <sup>1</sup>, Koenraad Van Hoorde <sup>2,3</sup> and Cinzia Caggia <sup>1</sup>

<sup>1</sup>Department of Agriculture, Food and Environment, University of Catania, Catania 95123, Italy; lubiondi@unict.it (L.B.); nunziatinarusso83@gmail.com (N.R.); alessandra.pino@unict.it (A.P.); antonio.natalello@unict.it (A.N.); ccaggia@unict.it (C.C.)

<sup>2</sup>Service Foodborne Pathogens, Sciensano, Brussels B-1050, Belgium

<sup>3</sup>Faculty of Bioscience Engineering, Department of Biotechnology, Laboratory of Brewing Science and Technology, Ghent University, Ghent B-9000, Belgium, Koenraad.VanHoorde@sciensano.be

**Table S1.** Effect of the dietary treatment<sup>1</sup> on the main fatty acids (g/100 of total FAME) of meat.

|                      | Dietary Treatment  |                    |                     | SEM <sup>2</sup> | <i>p</i> Values |
|----------------------|--------------------|--------------------|---------------------|------------------|-----------------|
|                      | C                  | T                  | M                   |                  |                 |
| C12:0                | <b>0.13</b>        | 0.12               | 0.13                | 0.005            | 0.658           |
| C14:0                | 3.02               | 2.74               | 2.78                | 0.109            | 0.547           |
| C16:0                | 24.03              | 23.76              | 23.51               | 0.437            | 0.905           |
| C16:0 <i>iso</i>     | 0.12               | 0.11               | 0.11                | 0.003            | 0.391           |
| C16:1 c7             | 0.30 <sup>a</sup>  | 0.24 <sup>b</sup>  | 0.27 <sup>ab</sup>  | 0.009            | 0.018           |
| C16:1 c9             | 1.90 <sup>a</sup>  | 1.52 <sup>b</sup>  | 1.62 <sup>ab</sup>  | 0.068            | 0.050           |
| C17:0                | 1.14               | 0.93               | 1.05                | 0.056            | 0.333           |
| C17:0 <i>iso</i>     | 0.35               | 0.34               | 0.35                | 0.008            | 0.819           |
| C17:0 <i>anteiso</i> | 0.47 <sup>a</sup>  | 0.39 <sup>b</sup>  | 0.45 <sup>ab</sup>  | 0.011            | 0.013           |
| C17:1 c9             | 0.71 <sup>a</sup>  | 0.51 <sup>b</sup>  | 0.59 <sup>ab</sup>  | 0.036            | 0.051           |
| C18:0                | 12.05              | 13.05              | 13.67               | 0.298            | 0.069           |
| C18:1 c9             | 38.54 <sup>a</sup> | 34.47 <sup>b</sup> | 37.72 <sup>ab</sup> | 0.699            | 0.027           |
| C18:1 c11            | 1.53               | 1.62               | 1.34                | 0.064            | 0.181           |
| C18:1 c12            | 0.43               | 0.36               | 0.32                | 0.022            | 0.119           |
| C18:1 t9             | 0.26               | 0.23               | 0.31                | 0.016            | 0.137           |
| C18:1 t10            | 1.67 <sup>ab</sup> | 1.09 <sup>b</sup>  | 1.91 <sup>a</sup>   | 0.137            | 0.026           |
| C18:1 t11            | 0.77               | 0.57               | 0.59                | 0.052            | 0.212           |
| C18:2 c9 t11         | 0.44               | 0.31               | 0.32                | 0.027            | 0.071           |
| C18:2 c9 c12         | 6.78               | 9.85               | 7.34                | 0.609            | 0.080           |
| C18:3 n-3            | 0.52               | 0.57               | 0.54                | 0.018            | 0.580           |
| C20:4 n-6            | 1.30               | 2.80               | 1.33                | 0.347            | 0.125           |
| C22:5 n-3            | 0.20               | 0.46               | 0.20                | 0.065            | 0.160           |

<sup>1</sup> C = concentrate-based diet; T and M mean C diet + 4% tannin extract from either Tara or Mimosa. <sup>2</sup> SEM = standard error of mean. <sup>a, b</sup> Within a row, different superscript letters indicate differences ( $p \leq 0.05$ ) between dietary treatments tested using the Tukey's adjustment for multiple comparisons.
